# Supplementary material for: Recurrent gain-of-function USP8 mutations in Cushing's disease
Source: PubMed Central journal article supplement — Cell Res. 2015 Feb 13;25(3):306–17. doi: 10.1038/cr.2015.20 (PMC4349249; doi:10.1038/cr.2015.20), 2015-02-13

## Supplementary information, Table S1

**Table S1 Overview on the patients included in this genetic study and summary of USP8 mutational status of these patients.** Data are based on whole-exome sequencing and Sanger sequencing validation. The number of patients is indicated by n.

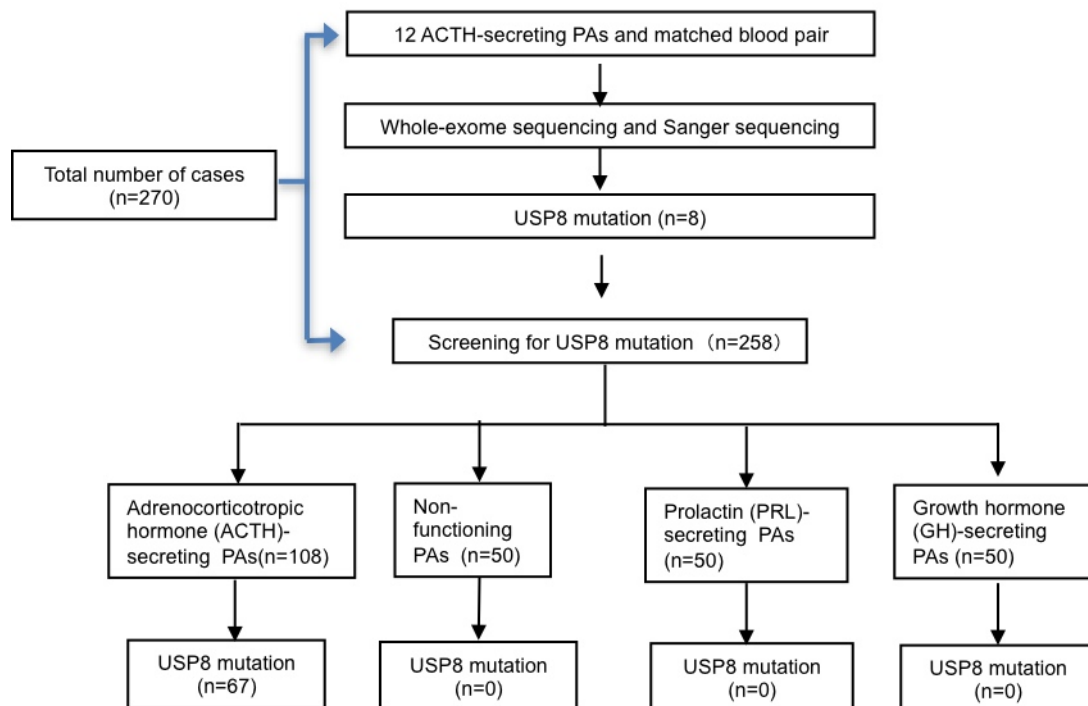

Supplement: cr201520x1.pdf [file cr201520x1.pdf]
