# Supplementary material for: Recurrent gain-of-function USP8 mutations in Cushing's disease
Source: PubMed Central journal article supplement — Cell Res. 2015 Feb 13;25(3):306–17. doi: 10.1038/cr.2015.20 (PMC4349249; doi:10.1038/cr.2015.20), 2015-02-13
Supplement: cr201520x2.pdf [file cr201520x2.pdf]

**Table S2 Overview on mutations found in individual tumor sample upon exome sequencing and Sanger sequencing.**

| Patient.# | Type                   | Gene symbol | Genomic position                | Transcript   | Exon   | CDS level      | Protein level | Mutation type |
|-----------|------------------------|-------------|---------------------------------|--------------|--------|----------------|---------------|---------------|
| #1        | missense               | USP29       | chr19:g.57641397A>G             | NM_020903    | exon4  | c.A1354G       | p.N452D       | de_novo       |
|           | missense               | STAG2       | chrX:g.123191774G>C             | NM_001042751 | exon15 | c.G1363C       | p.G455R       | de_novo       |
|           | nonsense               | IGSF10      | chr3:g.151164002G>C             | NM_178822    | exon4  | c.C3767G       | p.S1256*      | de_novo       |
|           | missense               | IL18RAP     | chr2:g.103061734G>T             | NM_003853    | exon9  | c.G1006T       | p.A336S       | de_novo       |
|           | nonframeshift deletion | USP8        | chr15:g.50782639_50782641delCTC | NM_005154    | exon14 | c.2151_2153del | p.S718del     | de_novo       |
| #2        | nonsense               | PRAMEF18    | chr1:g.13475108G>A              | NM_001099850 | exon3  | c.C1021T       | p.R341*       | de_novo       |
|           | missense               | MAST4       | chr5:g.66396272T>G              | NM_001164664 | exon8  | c.T922G        | p.S308A       | de_novo       |
|           | missense               | STX19       | chr3:g.93733584A>T              | NM_001001850 | exon2  | c.T530A        | p.M177K       | de_novo       |
|           | missense               | SRF         | chr6:g.43139732G>A              | NM_003131    | exon1  | c.G338A        | p.G113E       | de_novo       |
|           | missense               | CCBL1       | chr9:g.131605030T>C             | NM_001287390 | exon5  | c.A386G        | p.Q129R       | de_novo       |
|           | synonymous             | ORC5        | chr7:g.103824572T>C             | NM_181747    | exon7  | c.A732G        | p.E244E       | de_novo       |
|           | missense               | ESCO2       | chr8:g.27634348A>G              | NM_001017420 | exon3  | c.A523G        | p.I175V       | de_novo       |
| #3        | missense               | VWF         | chr12:g.6143905G>C              | NM_000552    | exon20 | c.C2634G       | p.F878L       | de_novo       |
|           | missense               | ORC4        | chr2:g.148701078T>C             | NM_181742    | exon10 | c.A776G        | p.D259G       | de_novo       |
|           | missense               | PPFIA3      | chr19:g.49646247G>T             | NM_003660    | exon21 | c.G2731T       | p.A911S       | de_novo       |
|           | missense               | USP8        | chr15:g.50782647C>G             | NM_005154    | exon14 | c.C2159G       | p.P720R       | de_novo       |
|           | synonymous             | FAM3D       | chr3:g.58625897C>T              | NM_138805    | exon7  | c.G330A        | p.T110T       | de_novo       |
|           | synonymous             | SERPIND1    | chr22:g.21133909G>A             | NM_000185    | exon2  | c.G309A        | p.P103P       | de_novo       |
| #4        | missense               | VSTM5       | chr11:g.93553760A>G             | NM_001144871 | exon4  | c.T578C        | p.I193T       | rs145330903   |
|           | missense               | ABCC12      | chr16:g.48119545G>C             | NM_033226    | exon27 | c.C3787G       | p.Q1263E      | de_novo       |
|           | missense               | BCOR        | chrX:g.39934316C>T              | NM_001123385 | exon4  | c.G283A        | p.G95R        | de_novo       |
|           | missense               | MXRA5       | chrX:g.3248316G>A               | NM_015419    | exon4  | c.C452T        | p.T151M       | de_novo       |
|           | missense               | LARP6       | chr15:g.71125005C>G             | NM_018357    | exon3  | c.G862C        | p.A288P       | de_novo       |
|           | missense               | DDX5        | chr17:g.62496117T>C             | NM_004396    | exon13 | c.A1769G       | p.Q590R       | de_novo       |
| #5        | missense               | NME5        | chr5:g.137474451G>A             | NM_003551    | exon2  | c.C19T         | p.P7S         | de_novo       |
|           | missense               | CPM         | chr12:g.69279576T>C             | NM_001874    | exon3  | c.A254G        | p.D85G        | de_novo       |
|           | missense               | URGCP       | chr7:g.43917756C>T              | NM_001077664 | exon6  | c.G1177A       | p.G393S       | de_novo       |
|           | synonymous             | AKAP13      | chr15:g.86123393C>T             | NM_006738    | exon7  | c.C2094T       | p.P698P       | de_novo       |
|           | missense               | UGT8        | chr4:g.115544086T>C             | NM_001128174 | exon2  | c.T50C         | p.I17T        | de_novo       |
|           | missense               | NRP2        | chr2:g.206581044G>T             | NM_201267    | exon3  | c.G379T        | p.D127Y       | de_novo       |
|           | missense               | PRKAA2      | chr1:g.57170038T>G              | NM_006252    | exon7  | c.T1183G       | p.L395V       | de_novo       |
|           | missense               | GTF3C3      | chr2:g.197639942A>G             | NM_012086    | exon13 | c.T1729C       | p.S577P       | de_novo       |
|           | missense               | USP8        | chr15:g.50782640T>C             | NM_005154    | exon14 | c.T2152C       | p.S718P       | de_novo       |
| #6        | missense               | USP8        | chr15:g.50782647C>G             | NM_005154    | exon14 | c.C2159G       | p.P720R       | de_novo       |
| #7        | missense               | GABRE       | chrX:g.151123466C>A             | NM_004961    | exon9  | c.G1228T       | p.V410F       | rs377185335   |
|           | missense               | ZNF846      | chr19:g.9873961G>C              | NM_001077624 | exon3  | c.C139G        | p.L47V        | de_novo       |
|           | missense               | APBB1       | chr11:g.6417349A>T              | NM_001257321 | exon12 | c.T992A        | p.L331H       | de_novo       |
|           | missense               | USP8        | chr15:g.50782640T>C             | NM_005154    | exon14 | c.T2152C       | p.S718P       | de_novo       |
| #8        | synonymous             | SLC22A31    | chr16:g.89262557C>T             | NM_001242757 | exon8  | c.G867A        | p.E289E       | de_novo       |
|           | synonymous             | MC5R        | chr18:g.13826649T>C             | NM_005913    | exon1  | c.T885C        | p.Y295Y       | de_novo       |
|           | missense               | USP8        | chr15:g.50782640T>C             | NM_005154    | exon14 | c.T2152C       | p.S718P       | de_novo       |
| #9        | synonymous             | SOCS5       | chr2:g.46986776C>G              | NM_014011    | exon2  | c.C1107G       | p.L369L       | de_novo       |
|           | synonymous             | TTC21A      | chr3:g.39162556C>A              | NM_145755    | exon9  | c.C993A        | p.P331P       | de_novo       |
|           | missense               | SIPA1       | chr11:g.65416868T>A             | NM_006747    | exon10 | c.T2442A       | p.D814E       | de_novo       |
|           | missense               | PLCL2       | chr3:g.17053434G>A              | NM_015184    | exon2  | c.G2218A       | p.G740R       | de_novo       |
|           | missense               | USP8        | chr15:g.50782640T>C             | NM_005154    | exon14 | c.T2152C       | p.S718P       | de_novo       |
| #10       | nonsense               | SLC27A1     | chr19:g.17615296C>T             | NM_198580    | exon12 | c.C1816T       | p.R606*       | rs201661631   |
|           | synonymous             | MED13L      | chr12:g.116434406C>T            | NM_015335    | exon16 | c.G2871A       | p.P957P       | de_novo       |
|           | nonsense               | NR3C1       | chr5:g.142675154G>A             | NM_001204263 | exon7  | c.C904T        | p.Q302*       | de_novo       |
| #11       | synonymous             | KDR         | chr4:g.55976673C>T              | NM_002253    | exon9  | c.G1152A       | p.T384T       | rs200767530   |
|           | synonymous             | ITK         | chr5:g.156608006C>T             | NM_005546    | exon1  | c.C18T         | p.L6L         | de_novo       |
|           | missense               | TICRR       | chr15:g.90166869C>T             | NM_152259    | exon20 | c.C3328T       | p.H1110Y      | de_novo       |
|           | missense               | NUFIP1      | chr13:g.45554933T>G             | NM_012345    | exon3  | c.A518C        | p.H173P       | de_novo       |
| #12       | missense               | LY75-CD302  | chr2:g.160672078C>T             | NM_001198760 | exon31 | c.G4387A       | p.E1463K      | de_novo       |
|           | missense               | SLC24A2     | chr9:g.19573359G>A              | NM_001193288 | exon5  | c.C1286T       | p.A429V       | de_novo       |
|           | synonymous             | KLF15       | chr3:g.126071367G>T             | NM_014079    | exon2  | c.C399A        | p.V133V       | de_novo       |
|           | nonframeshift deletion | USP8        | chr15:g.5078263_50782641delCTC  | NM_005154    | exon14 | c.2151_2153del | p.S718del     | de_novo       |
