# Supplementary material for: Recurrent gain-of-function USP8 mutations in Cushing's disease
Source: PubMed Central journal article supplement — Cell Res. 2015 Feb 13;25(3):306–17. doi: 10.1038/cr.2015.20 (PMC4349249; doi:10.1038/cr.2015.20), 2015-02-13
Supplement: cr201520x3.pdf [file cr201520x3.pdf]

**Table S3:** Clinical details of 120 patients with Cushing's disease.

| Patient ID | USP8 mutation   | Sex | Age (year) | BMI  | Associated signs and symptoms | Accompanying diseases | Size (cm) | Tumor invasion | Plasma corticotropin (ACTH) (pg/ml) | Midnight serum cortisol (µg/dl) | Urinary free cortisol (µg/24 h) | LDST | HDST | Immunostain for ACTH | Available data for diagnosis            | IPOBR | POR | RP (month) |
|------------|-----------------|-----|------------|------|-------------------------------|-----------------------|-----------|----------------|-------------------------------------|---------------------------------|---------------------------------|------|------|----------------------|-----------------------------------------|-------|-----|------------|
| WES-1      | p.S718del       | F   | 36         | 25.2 | mf,f                          | HTN,OSTEO             | 0.8       | No             | 68.8                                | 21.20                           | 632.84                          | Yes  | Yes  | 3+                   | Clin,ACTH,Scort,UFC,LDST,HDST,MRI       | Yes   | No  |            |
| WES-2      | none            | F   | 46         | 24.2 | wg                            |                       | 4.0       | Yes            | 208.0                               | 31.22                           | 981.04                          | Yes  | N/A  | 2+                   | Clin,ACTH,Scort,UFC,LDST,MRI            | No    | N/A |            |
| WES-3      | p.P720R         | F   | 38         | 22.8 | wg,amen,mf,bh                 | HTN,DM, OSTEO         | 0.8       | No             | 57.4                                | 19.50                           | 808.38                          | Yes  | Yes  | 3+                   | Clin,ACTH,Scort,UFC,LDST,HDST,MRI       | Yes   | No  |            |
| WES-4      | none            | F   | 36         | 25.0 | wg,acne                       | HTN                   | 2.2       | Yes            | 21.1                                | 39.07                           | 1134.90                         | Yes  | Yes  | 2+                   | Clin,ACTH,Scort,UFC,LDST,HDST,MRI       | Yes   | No  |            |
| WES-5      | p.S718P         | F   | 43         | 24.4 | f,emot, amen                  | HYKM                  | 1.1       | No             | 89.3                                | 30.57                           | 1164.00                         | Yes  | Yes  | 2+                   | Clin,ACTH,Scort,UFC,LDST,HDST,MRI       | Yes   | Yes | 22         |
| WES-6      | p.P720R         | F   | 32         | 28.3 | wg,acne,amen,pigm             |                       | 1.5       | No             | 136.0                               | 19.12                           | 344.70                          | Yes  | Yes  | 3+                   | Clin,ACTH,Scort,UFC,LDST,HDST,MRI       | Yes   | No  |            |
| WES-7      | p.S718P         | F   | 36         | 20.8 | ed,f,ina                      | HTN                   | 0.8       | No             | 69.8                                | 34.65                           | 1147.86                         | Yes  | N/A  | 3+                   | Clin,ACTH,Scort,UFC,LDST,MRI            | Yes   | No  |            |
| WES-8      | p.S718P         | F   | 43         | 22.2 | wg,acne,mf,bh,ed              |                       | 0.8       | No             | 64.0                                | 24.34                           | 238.97                          | Yes  | Yes  | 3+                   | Clin,ACTH,Scort,UFC,LDST,HDST,MRI       | Yes   | No  |            |
| WES-9      | p.S718P         | F   | 41         | 23.8 | wg,acne,amen,emot             | HTN                   | 1.0       | No             | 86.6                                | 52.94                           | 325.80                          | LDST | Yes  | 3+                   | Clin,ACTH,Scort,UFC,LDST,HDST,MRI       | Yes   | No  |            |
| WES-10     | none            | F   | 34         | 28.3 | wg,acne, amen                 |                       | 1.5       | No             | 95.9                                | 27.16                           | 1179.36                         | Yes  | Yes  | 3+                   | Clin,ACTH,Scort,UFC,LDST,HDST,MRI       | Yes   | No  |            |
| WES-11     | none            | F   | 40         | 21.5 | amen,f,hair                   | DM,HTN, OSTEO         | 5.0       | Yes            | 100.0                               | 31.17                           | 640.48                          | Yes  | Yes  | 3+                   | Clin,ACTH,Scort,UFC,LDST,HDST,MRI       | No    | N/A |            |
| WES-12     | p.S718del       | F   | 15         | 21.8 | wg,mf,bh,amen,acne,f          |                       | 0.5       | No             | 70.4                                | 20.57                           | 247.25                          | Yes  | Yes  | 3+                   | Clin,ACTH,Scort,UFC,LDST,HDST,MRI,BIPSS | Yes   | Yes | 39         |
| Val-1      | p.S719P         | F   | 43         | 29.6 | wg,amen,str,acne              | DM                    | N/A       | N/A            | 40.3                                | 18.60                           | N/A                             | N/A  | N/A  | +                    | Clin,ACTH, Scort                        | Yes   | No  |            |
| Val-2      | p.716-730del    | F   | 38         | 24.4 | wg,mf,bh,amen,str             |                       | 0.6       | No             | 29.7                                | 16.60                           | 192.80                          | Yes  | Yes  | 2+                   | Clin,ACTH,Scort,UFC,LDST,HDST,MRI,BIPSS | Yes   | Yes | 48         |
| Val-3      | p.S718del       | F   | 33         | 26.6 | wg,mf,bh                      | DM                    | 1.2       | No             | 269.0                               | N/A                             | N/A                             | N/A  | N/A  | 3+                   | Clin,ACTH, MRI                          | Yes   | No  |            |
| Val-4      | p.PD720-721del  | F   | 23         | 28.6 | wg,mf                         |                       | 0.5       | No             | 84.3                                | N/A                             | N/A                             | N/A  | N/A  | 3+                   | Clin,ACTH, MRI                          | Yes   | Yes | 12         |
| Val-5      | p.Y717S,p.P720A | F   | 22         | 23.9 | wg,str,amen,acne,mf,ecch      | HTN,DM                | 0.3       | No             | 63.2                                | 27.06                           | 679.77                          | Yes  | Yes  | +                    | Clin,ACTH,Scort,UFC,LDST,HDST,MRI       | Yes   | Yes | 17         |
| Val-6      | p.S718P         | F   | 30         | 28.4 | mf,bh,f                       | HTN                   | 0.7       | No             | 62.6                                | 19.85                           | N/A                             | N/A  | N/A  | 2+                   | Clin,ACTH,Scort, MRI                    | No    | N/A |            |
| Val-7      | p.S719P,p.D721N | F   | 41         | 23.9 | amen,infx                     | HTN                   | 1.5       | No             | N/A                                 | 22.86                           | N/A                             | N/A  | N/A  | 3+                   | Clin,Scort,MRI                          | Yes   | No  |            |
| Val-8      | p.P720R         | F   | 43         | 26.7 | wg                            |                       | 0.5       | No             | N/A                                 | N/A                             | N/A                             | N/A  | N/A  | 3+                   | Clin,MRI,BIPSS                          | Yes   | No  |            |
| Val-9      | p.P720R         | F   | 32         | 20.8 | wg,amen,acne                  | HYKM                  | 0.8       | No             | N/A                                 | N/A                             | N/A                             | N/A  | N/A  | 3+                   | Clin,MRI                                | Yes   | No  |            |
| Val-10     | p.S718del       | F   | 37         | 20.6 | wg,mf,acne,f,amen             |                       | 0.8       | No             | 90.3                                | N/A                             | 1261.00                         | N/A  | N/A  | 3+                   | Clin,ACTH,UFC, MRI                      | Yes   | No  |            |
| Val-11     | p.S718P         | F   | 52         | 26.4 | wg,amen,ed                    | HTN,DM, OSTEO         | 0.5       | No             | 68.4                                | 19.79                           | 658.26                          | Yes  | Yes  | 3+                   | Clin,ACTH,Scort,UFC,LDST,HDST,MRI,BIPSS | Yes   | No  |            |
| Val-12     | p.S718F         | F   | 60         | 24.7 | wg,acne,f                     | HTN,DM                | 0.3       | No             | 116.0                               | N/A                             | N/A                             | N/A  | Yes  | 2+                   | Clin,ACTH,HDST,MRI                      | No    | N/A |            |
| Val-13     | p.P720R         | F   | 37         | 26.7 | wg,ed,mf,str,f                | HYKM                  | 0.9       | No             | 66.5                                | 29.40                           | 445.74                          | Yes  | Yes  | 3+                   | Clin,ACTH,Scort,UFC,LDST,HDST,MRI       | Yes   | No  |            |
| Val-14     | p.S718P         | F   | 24         | 29.3 | wg,emot,hair,str,f            | HTN                   | 1.0       | Yes            | 103.0                               | 27.60                           | 2653.79                         | Yes  | Yes  | 3+                   | Clin,ACTH,Scort,UFC,LDST,HDST,MRI       | No    | N/A |            |
| Val-15     | p.P720R         | M   | 18         | 24.0 | wg,mf,acne,bh,f               |                       | 0.6       | No             | N/A                                 | 29.41                           | 2352.90                         | Yes  | Yes  | 2+                   | Clin,Scort,UFC,LDST,HDST,MRI            | Yes   | No  |            |
| Val-16     | p.P720R         | F   | 33         | 26.2 | wg,amen, pigm                 | HTN                   | 0.6       | No             | 75.8                                | 19.33                           | 954.00                          | Yes  | Yes  | 3+                   | Clin,ACTH,Scort,UFC,LDST,HDST,MRI       | Yes   | No  |            |
| Val-17     | p.S718F         | F   | 27         | 21.1 | wg,acne                       |                       | N/A       | No             | 37.4                                | 13.38                           | 165.87                          | Yes  | Yes  | +                    | Clin,ACTH,Scort,UFC,LDST,HDST,BIPSS     | Yes   | No  |            |

**Table S3:** (continued)

| Patient ID | USP8 mutation   | Sex | Age (year) | BMI  | Associated signs and symptoms | Accompanying diseases | Size (cm) | Tumor invasion | Plasma corticotropin (ACTH) (pg/ml) | Midnight serum cortisol (µg/dl) | Urinary free cortisol (µg/24 h) | LDST | HDST | Immunostain for ACTH | Available data for diagnosis            | IPOBR | POR | RP (month) |
|------------|-----------------|-----|------------|------|-------------------------------|-----------------------|-----------|----------------|-------------------------------------|---------------------------------|---------------------------------|------|------|----------------------|-----------------------------------------|-------|-----|------------|
| Val-18     | p.S718del       | F   | 26         | 29.4 | wg,acne,amen,ed               | HTN                   | 1.0       | No             | 47.6                                | 20.96                           | 573.36                          | Yes  | Yes  | 3+                   | Clin,ACTH,Scort,UFC,LDST,HDST,MRI,BIPSS | Yes   | Yes | 96         |
| Val-19     | p.S718P         | M   | 38         | 23.2 | ed,f                          | HTN,DM                | 0.6       | No             | 230.0                               | 44.86                           | 1573.25                         | Yes  | Yes  | 2+                   | Clin,ACTH,Scort,UFC,LDST,HDST,MRI,BIPSS | Yes   | No  |            |
| Val-20     | p.S719del       | F   | 18         | 34.4 | wg,acne,str,amen              |                       | 0.8       | No             | 83.3                                | 13.10                           | 216.36                          | Yes  | Yes  | 3+                   | Clin,ACTH,Scort,UFC,LDST,HDST,MRI       | Yes   | Yes | 7          |
| Val-21     | p.S718del       | F   | 43         | 25.3 | f,mf,bh                       |                       | 0.8       | No             | 51.1                                | 37.01                           | 1153.04                         | Yes  | Yes  | 3+                   | Clin,ACTH,Scort,UFC,LDST,HDST,MRI,BIPSS | Yes   | No  |            |
| Val-22     | p.S718del       | F   | 54         | 24.8 | f,ina                         | HTN,OSTEO             | 0.7       | No             | 65.8                                | N/A                             | N/A                             | Yes  | Yes  | 3+                   | Clin,ACTH,LDST,HDST,MRI                 | Yes   | No  |            |
| Val-23     | p.P720Q         | F   | 35         | 23.6 | wg,mf,acne,str,ed             |                       | 0.6       | No             | 194.0                               | 43.93                           | N/A                             | Yes  | Yes  | 3+                   | Clin,ACTH,Scort,LDST,HDST, MRI          | Yes   | No  |            |
| Val-24     | p.PDIT720-723L  | F   | 31         | 22.4 | amen,wg,mf                    |                       | 0.8       | No             | 64.2                                | N/A                             | N/A                             | Yes  | N/A  | 3+                   | Clin,ACTH,LDST,MRI,BIPSS                | Yes   | Yes | 16         |
| Val-25     | p.P720R         | M   | 15         | 37.6 | wg,acne,mf                    |                       | 0.7       | No             | 26.7                                | 24.53                           | 1000.94                         | Yes  | Yes  | 3+                   | Clin,ACTH,Scort,UFC,LDST,HDST,MRI,BIPSS | No    | N/A |            |
| Val-26     | p.P720R         | F   | 24         | 22.8 | ed,str,acne,mf,bh,f           |                       | 0.5       | No             | 81.8                                | 28.35                           | 356.24                          | Yes  | Yes  | 3+                   | Clin,ACTH,Scort,UFC,LDST,HDST,MRI       | Yes   | No  |            |
| Val-27     | p.P720Q         | F   | 26         | 19.9 | acne,ed,amen                  |                       | 0.5       | No             | 103.0                               | N/A                             | N/A                             | N/A  | N/A  | 3+                   | Clin,ACTH,MRI                           | Yes   | No  |            |
| Val-28     | p.P720R         | F   | 47         | 26.1 | wg,mf,str                     | HTN                   | 0.8       | No             | N/A                                 | N/A                             | N/A                             | N/A  | N/A  | +                    | Clin,MRI,BIPSS                          | Yes   | No  |            |
| Val-29     | p.S718del       | F   | 30         | 26.0 | amen                          |                       | 0.5       | No             | 30.9                                | 41.60                           | 219.46                          | Yes  | Yes  | 3+                   | Clin,ACTH,Scort,UFC,LDST,HDST,MRI       | Yes   | No  |            |
| Val-30     | p.S718P         | F   | 23         | 19.5 | amen,acne,mf                  |                       | 0.8       | No             | 61.0                                | 29.20                           | 755.86                          | Yes  | Yes  | 3+                   | Clin,ACTH,Scort,UFC,LDST,HDST,MRI,BIPSS | Yes   | No  |            |
| Val-31     | p.P720R,p.A725T | F   | 30         | 25.4 | wg                            |                       | 0.4       | Yes            | 42.8                                | 9.36                            | N/A                             | N/A  | N/A  | +                    | Clin,ACTH,Scort,MRI                     | Yes   | N/A |            |
| Val-32     | p.P720R         | F   | 40         | 21.0 | amen                          | HTN,OSTEO             | N/A       | No             | 45.0                                | 9.29                            | N/A                             | N/A  | N/A  | 3+                   | Clin,ACTH,Scort                         | Yes   | N/A |            |
| Val-33     | p.P720R         | F   | 33         | 24.1 | wg,mf,amen,ed,str             |                       | N/A       | No             | 108.0                               | N/A                             | N/A                             | Yes  | N/A  | 3+                   | Clin,ACTH, LDST                         | Yes   | Yes | 36         |
| Val-34     | p.S718P         | F   | 26         | 31.3 | wg,amen,acne,str              |                       | N/A       | No             | N/A                                 | 10.53                           | N/A                             | N/A  | N/A  | 2+                   | Clin,Scort                              | No    | N/A |            |
| Val-35     | p.P720Q         | F   | 43         | 32.9 | wg,mf                         | HTN,DM                | 0.3       | No             | 129.0                               | 23.10                           | 147.32                          | Yes  | Yes  | 3+                   | Clin,ACTH,Scort,UFC,LDST,HDST,MRI,BIPSS | No    | N/A |            |
| Val-36     | p.P720R         | F   | 51         | 28.5 | wg,acne,ecch                  | HTN                   | 0.4       | No             | 95.0                                | 22.07                           | 416.85                          | Yes  | N/A  | 3+                   | Clin,ACTH,Scort,UFC,LDST,MRI,BIPSS      | No    | N/A |            |
| Val-37     | p.P720R         | M   | 21         | 23.0 | wg,acne,str,ed                | HTN,HYKM              | 0.4       | No             | 108.0                               | N/A                             | 724.56                          | Yes  | Yes  | 2+                   | Clin,ACTH,UFC,LDST,HDST,MRI,BIPSS       | Yes   | No  |            |
| Val-38     | p.S718P         | F   | 48         | 27.7 | wg                            | HTN,DM                | 0.4       | No             | N/A                                 | 23.30                           | 698.11                          | Yes  | Yes  | 3+                   | Clin,Scort,UFC,LDST,HDST,MRI            | Yes   | No  |            |
| Val-39     | p.P720R         | F   | 42         | 24.0 | wg,mf,str                     | HTN                   | 0.6       | Yes            | 54.1                                | 16.63                           | 529.10                          | Yes  | Yes  | 2+                   | Clin,ACTH,Scort,UFC,LDST,HDST,MRI       | Yes   | No  |            |
| Val-40     | p.S718del       | F   | 50         | 28.4 | wg,amen                       | HTN,OSTEO             | 0.8       | No             | 103.0                               | N/A                             | N/A                             | N/A  | N/A  | 2+                   | Clin,ACTH,MRI                           | Yes   | No  |            |
| Val-41     | p.S718P         | F   | 53         | 17.3 | f,ina,infx                    | HTN                   | 0.6       | No             | 121.0                               | 44.96                           | 166.78                          | Yes  | Yes  | +                    | Clin,ACTH,Scort,UFC,LDST,HDST,MRI       | Yes   | No  |            |
| Val-42     | p.P720R         | M   | 16         | 29.4 | wg,acne                       |                       | 0.5       | No             | 158.0                               | N/A                             | N/A                             | Yes  | Yes  | 2+                   | Clin,ACTH,LDST,HDS T,MRI                | Yes   | No  |            |
| Val-43     | p.S718P         | F   | 43         | 21.8 | wg,mf,f,ina,amen              |                       | 0.8       | No             | 26.7                                | N/A                             | 199.20                          | N/A  | N/A  | 2+                   | Clin,ACTH,UFC, MRI                      | No    | N/A |            |
| Val-44     | p.D721N         | F   | 31         | 28.0 | wg,amen,acne                  |                       | 0.8       | No             | 129.0                               | N/A                             | N/A                             | N/A  | N/A  | 3+                   | Clin,ACTH,MRI                           | Yes   | Yes | 36         |
| Val-45     | p.S718P         | F   | 41         | 23.4 | emot                          | HTN                   | 1.5       | Yes            | 46.6                                | 27.70                           | N/A                             | N/A  | N/A  | 2+                   | Clin,ACTH,Scort,MRI                     | Yes   | N/A |            |
| Val-46     | p.S718del       | M   | 15         | 25.4 | wg                            |                       | 0.9       | Yes            | 85.7                                | N/A                             | N/A                             | N/A  | N/A  | +                    | Clin,ACTH,MRI                           | No    | N/A |            |
| Val-47     | p.S718del       | F   | 26         | 22.8 | wg,mf,bh,ecch,str             |                       | 0.4       | No             | 32.7                                | 18.10                           | N/A                             | N/A  | N/A  | 3+                   | Clin,ACTH,Scort,MRI                     | Yes   | N/A |            |
| Val-48     | p.R715C,p.S718F | F   | 45         | 19.5 | mf,bh,f                       |                       | 3.0       | Yes            | 51.7                                | N/A                             | N/A                             | N/A  | N/A  | 2+                   | Clin,ACTH,MRI                           | Yes   | No  |            |

Table S3: (continued)

| Patient ID | USP8 mutation     | Sex | Age (year) | BMI  | Associated signs and symptoms | Accompanying diseases | Size (cm) | Tumor invasion | Plasma corticotropin (ACTH) (pg/ml) | Midnight serum cortisol (µg/dl) | Urinary free cortisol (µg/24 h) | LDST | HDST | Immunostain for ACTH | Available data for diagnosis            | IPOBR | POR | RP (month) |
|------------|-------------------|-----|------------|------|-------------------------------|-----------------------|-----------|----------------|-------------------------------------|---------------------------------|---------------------------------|------|------|----------------------|-----------------------------------------|-------|-----|------------|
| Val-49     | p.T735I           | M   | 36         | 24.6 | wg,skin                       |                       | 5.0       | Yes            | 56.8                                | N/A                             | 278.25                          | Yes  | Yes  | +                    | Clin,ACTH,UFC,LDST,HDST, MRI            | Yes   | No  |            |
| Val-50     | p.P720R           | F   | 33         | 21.9 | amen,mf                       | HTN                   | 1.2       | No             | 50.1                                | 14.27                           | 176.30                          | N/A  | N/A  | 3+                   | Clin,ACTH,Scort,UFC,MRI                 | No    | N/A |            |
| Val-51     | p.P720R           | F   | 23         | 19.2 | mf,acne,amen,f                |                       | 0.3       | No             | 64.5                                | N/A                             | N/A                             | N/A  | N/A  | 3+                   | Clin,ACTH,MRI                           | Yes   | Yes | 18         |
| Val-52     | p.S718del         | F   | 36         | 24.2 | wg,amen,mf,bh                 | HTN                   | 2.5       | Yes            | N/A                                 | N/A                             | 431.38                          | N/A  | N/A  | 3+                   | Clin,UFC,MRI                            | Yes   | No  |            |
| Val-53     | p.S718del,p.S716F | F   | 36         | 21.1 | amen                          |                       | N/A       | N/A            | 72.0                                | 12.55                           | 552.64                          | N/A  | Yes  | 3+                   | Clin,ACTH,Scort,UFC,HDST                | Yes   | No  |            |
| Val-54     | p.P720R           | M   | 36         | 25.6 | wg,mf,f                       | HTN,DM                | 0.5       | No             | 368.0                               | N/A                             | N/A                             | Yes  | N/A  | 3+                   | Clin,ACTH,LDST,MRI,BIPSS                | Yes   | No  |            |
| Val-55     | p.P720R           | F   | 38         | 23.8 | f,ed,str,mf,acne              |                       | 0.6       | No             | N/A                                 | N/A                             | N/A                             | Yes  | Yes  | 3+                   | Clin,LDST,HDST,MRI                      | Yes   | No  |            |
| Val-56     | p.S718del         | F   | 37         | 22.9 | ed                            |                       | 0.4       | No             | 61.0                                | N/A                             | 2055.00                         | N/A  | N/A  | 2+                   | Clin,ACTH,UFC,MRI,BIPSS                 | Yes   | No  |            |
| Val-57     | p.S718del         | F   | 37         | 24.0 | amen,hair,mf,bh               |                       | 0.5       | No             | 67.2                                | 5.14                            | 313.25                          | Yes  | Yes  | 3+                   | Clin,ACTH,UFC,LDST,HDST, MRI,BIPSS      | Yes   | No  |            |
| Val-58     | p.P720R           | F   | 42         | 18.0 | wg,mf,amen                    |                       | N/A       | N/A            | 146.0                               | N/A                             | N/A                             | N/A  | N/A  | 3+                   | Clin,ACTH                               | Yes   | No  |            |
| Val-59     | p.P720R           | F   | 30         | 31.2 | wg,mf,amen,emot               | HTN                   | N/A       | N/A            | 35.3                                | 32.82                           | N/A                             | N/A  | N/A  | +                    | Clin,ACTH,Scort                         | No    | N/A |            |
| Val-60     | p.S718P           | F   | 47         | 29.3 | wg                            | HTN                   | N/A       | N/A            | 164.0                               | N/A                             | N/A                             | N/A  | N/A  | 2+                   | Clin,ACTH                               | No    | N/A |            |
| Val-61     | p.S718P           | F   | 51         | 29.3 | wg                            | HTN                   | N/A       | N/A            | 39.2                                | 25.17                           | 494.04                          | Yes  | Yes  | 2+                   | Clin,ACTH,Scort,UFC,LDST, HDST          | Yes   | No  |            |
| Val-62     | p.P720R           | F   | 39         | 26.1 | mf,bh                         | HTN,HYKM              | N/A       | N/A            | 91.0                                | N/A                             | N/A                             | N/A  | N/A  | 3+                   | Clin,ACTH                               | Yes   | No  |            |
| Val-63     | p.P720R           | F   | 27         | 20.2 | ed                            |                       | N/A       | N/A            | 152.0                               | N/A                             | N/A                             | N/A  | N/A  | 2+                   | Clin,ACTH                               | Yes   | Yes | 36         |
| Val-64     | p.S718del         | F   | 31         | 24.4 | ed                            | HTN                   | N/A       | N/A            | 66.7                                | 18.71                           | N/A                             | N/A  | N/A  | 3+                   | Clin,ACTH,Scort                         | Yes   | No  |            |
| Val-65     | p.S718del         | F   | 14         | 22.6 | wg,amen,bh                    |                       | N/A       | N/A            | 44.5                                | N/A                             | N/A                             | N/A  | N/A  | 3+                   | Clin,ACTH                               | Yes   | No  |            |
| Val-66     | p.S718P           | F   | 22         | 21.1 | amen,mf,str                   |                       | N/A       | N/A            | N/A                                 | N/A                             | 750.94                          | N/A  | N/A  | 3+                   | Clin,UFC                                | Yes   | N/A |            |
| Val-67     | p.P720R           | F   | 34         | 24.0 | wg,acne,str                   | HTN,DM                | N/A       | N/A            | 238.0                               | 32.91                           | 2228.93                         | Yes  | Yes  | 3+                   | Clin,ACTH,Scort,UFC,LDST, HDST          | Yes   | No  |            |
| Val-68     | none              | F   | 57         | 32.3 | wg                            |                       | 4.5       | Yes            | 42.8                                | 11.56                           | 412.50                          | Yes  | Yes  | 2+                   | Clin,ACTH,Scort,UFC,LDST, HDST,MRI      | No    | N/A |            |
| Val-69     | none              | M   | 14         | 34.3 | wg,str,acne,mf,f              |                       | 1.1       | No             | 133.0                               | 7.26                            | 385.44                          | Yes  | Yes  | 2+                   | Clin,ACTH,UFC,LDST,HDST, MRI            | Yes   | No  |            |
| Val-70     | none              | F   | 53         | 20.2 | wg,f,str,eomt                 | DM,HTN                | 0.8       | No             | 67.1                                | 14.93                           | 207.18                          | Yes  | Yes  | 3+                   | Clin,ACTH,Scort,UFC,LDST,HDST,MRI,BIPSS | Yes   | No  |            |
| Val-71     | none              | F   | 37         | 24.1 | wg,amen,ed,str,f,ecch         |                       | N/A       | No             | 69.8                                | 21.82                           | 397.61                          | Yes  | Yes  | 3+                   | Clin,ACTH,Scort,UFC,LDST, HDST,BIPSS    | Yes   | Yes | 24         |
| Val-72     | none              | M   | 36         | 23.9 | wg,mf,str                     |                       | 1.8       | No             | 281.0                               | 18.80                           | 1559.30                         | Yes  | Yes  | 2+                   | Clin,ACTH,Scort,UFC,LDST, HDST,MRI      | Yes   | No  |            |
| Val-73     | none              | F   | 45         | 25.5 | wg,f,ed                       | OSTEO                 | 0.9       | No             | 39.1                                | 16.59                           | N/A                             | Yes  | Yes  | 3+                   | Clin,ACTH,Scort,LDST,HDST, MRI          | Yes   | No  |            |
| Val-74     | none              | M   | 31         | 28.4 | wg,str,acne,mf,bh             | HTN                   | 1.0       | No             | 163.0                               | 28.05                           | 1353.00                         | Yes  | Yes  | 3+                   | Clin,ACTH,Scort,UFC,LDST, HDST,MRI      | Yes   | No  |            |
| Val-75     | none              | F   | 24         | 33.2 | wg,mf,bh,ed                   | DM,HTN                | 1.1       | No             | 74.4                                | 22.31                           | 1131.40                         | Yes  | Yes  | 3+                   | Clin,ACTH,Scort,UFC,LDST, HDST,MRI      | Yes   | No  |            |
| Val-76     | none              | M   | 51         | 20.8 | f                             | DM,HTN                | 4.5       | Yes            | 138.0                               | 15.77                           | 106.90                          | Yes  | Yes  | +                    | ACTH,Scort,LDST, HDST,MRI               | Yes   | No  |            |
| Val-77     | none              | M   | 19         | 29.0 | wg,mf,ed,str,ecch             |                       | 1.5       | No             | 207.0                               | 49.81                           | 4100.00                         | Yes  | Yes  | 3+                   | Clin,ACTH,Scort,UFC,LDST, HDST,MRI      | Yes   | Yes | 12         |
| Val-78     | none              | F   | 22         | 18.4 | amen,acne,mf,emot             | HTN                   | 1.3       | No             | 53.6                                | 28.53                           | 828.80                          | Yes  | Yes  | +                    | Clin,ACTH,Scort,UFC,LDST, HDST,MRI      | No    | N/A |            |

**Table S3:** (continued)

| Patient ID | USP8 mutation | Sex | Age (year) | BMI  | Associated signs and symptoms | Accompanying diseases | Size (cm) | Tumor invasion | Plasma corticotropin (ACTH) (pg/ml) | Midnight serum cortisol (µg/dl) | Urinary free cortisol (µg/24 h) | LDST | HDST | Immunostain for ACTH | Available data for diagnosis              | IPOBR | POR | RP (month) |
|------------|---------------|-----|------------|------|-------------------------------|-----------------------|-----------|----------------|-------------------------------------|---------------------------------|---------------------------------|------|------|----------------------|-------------------------------------------|-------|-----|------------|
| Val-79     | none          | F   | 30         | 25.1 | amen,ed                       | HTN                   | 2.5       | Yes            | 142.0                               | 39.10                           | 1302.20                         | Yes  | Yes  | 3+                   | Clin,ACTH,Scort, UFC,LDST, HDST,MRI       | Yes   | Yes | 48         |
| Val-80     | none          | M   | 56         | 24.2 | wg,f                          |                       | 0.6       | No             | 120.0                               | N/A                             | N/A                             | Yes  | Yes  | 2+                   | Clin,ACTH,LDST, HDST,MRI                  | Yes   | No  |            |
| Val-81     | none          | F   | 34         | 24.4 | wg,amen,mf, pigm              | DM,HTN                | 1.0       | No             | 33.8                                | 20.05                           | 162.80                          | Yes  | Yes  | 2+                   | Clin,ACTH,Scort, UFC,LDST, HDST,MRI       | Yes   | No  |            |
| Val-82     | none          | F   | 46         | 28.1 | wg,mf,bh,f                    | OSTEO                 | N/A       | No             | 85.7                                | N/A                             | N/A                             | N/A  | N/A  | 3+                   | Clin,ACTH                                 | Yes   | N/A |            |
| Val-83     | none          | F   | 29         | 21.6 | wg,acne,str                   |                       | 5.0       | Yes            | 250.0                               | N/A                             | N/A                             | N/A  | N/A  | 2+                   | Clin,ACTH,MRI                             | Yes   | Yes | 48         |
| Val-84     | none          | F   | 41         | 25.1 | wg,mf,bh                      | DM                    | 3.9       | Yes            | 170.0                               | N/A                             | N/A                             | Yes  | Yes  | 2+                   | Clin,ACTH,LDST, HDST,MRI                  | No    | N/A |            |
| Val-85     | none          | M   | 52         | 26.4 | wg                            | HTN                   | 2.7       | Yes            | 80.5                                | N/A                             | N/A                             | N/A  | N/A  | 3+                   | Clin,ACTH,MRI                             | Yes   | No  |            |
| Val-86     | none          | M   | 25         | 30.2 | wg                            |                       | N/A       | No             | 94.0                                | N/A                             | N/A                             | N/A  | N/A  | 2+                   | Clin,ACTH                                 | Yes   | Yes | 12         |
| Val-87     | none          | M   | 43         | 26.7 | wg                            |                       | N/A       | N/A            | 265.0                               | N/A                             | N/A                             | N/A  | N/A  | 3+                   | Clin,ACTH                                 | Yes   | No  |            |
| Val-88     | none          | F   | 41         | 27.0 | amen                          |                       | 3.1       | Yes            | 86.7                                | N/A                             | N/A                             | N/A  | N/A  | 3+                   | Clin,ACTH,MRI                             | Yes   | No  |            |
| Val-89     | none          | M   | 53         | 27.2 | wg,mf,bh,f                    |                       | 3.7       | Yes            | 140.0                               | N/A                             | N/A                             | N/A  | N/A  | 2+                   | Clin,ACTH,MRI                             | No    | N/A |            |
| Val-90     | none          | F   | 51         | 21.6 | emot,f                        | HTN                   | 2.5       | Yes            | 21.2                                | 9.10                            | N/A                             | N/A  | N/A  | 3+                   | Clin,ACTH,Scort, MRI                      | Yes   | No  |            |
| Val-91     | none          | F   | 58         | 26.7 | wg,acne,hair                  |                       | 2.3       | Yes            | 267.0                               | N/A                             | N/A                             | N/A  | N/A  | +                    | Clin,ACTH,MRI                             | No    | N/A |            |
| Val-92     | none          | F   | 28         | 19.0 | wg,acne,amen                  |                       | 0.8       | No             | 47.7                                | 17.70                           | 449.31                          | Yes  | Yes  | 3+                   | Clin,ACTH,Scort, UFC,LDST, HDST,MRI       | Yes   | No  |            |
| Val-93     | none          | F   | 43         | 23.4 | wg,amen                       | OSTEO                 | 0.8       | No             | 70.6                                | 20.03                           | 115.66                          | Yes  | Yes  | 3+                   | Clin,ACTH,Scort, LDST, HDST,MRI           | No    | N/A |            |
| Val-94     | none          | F   | 25         | 24.7 | wg,ed,acne, amen              |                       | 1.2       | No             | N/A                                 | N/A                             | N/A                             | N/A  | N/A  | 2+                   | Clin,MRI                                  | Yes   | No  |            |
| Val-95     | none          | F   | 25         | 25.8 | wg,str,ed                     |                       | 1.3       | No             | 37.1                                | N/A                             | 479.76                          | N/A  | N/A  | 3+                   | Clin,ACTH,UFC, MRI                        | Yes   | Yes | 84         |
| Val-96     | none          | F   | 31         | 21.5 | wg,amen,mf                    | HTN                   | N/A       | N/A            | 60.6                                | 20.43                           | 721.20                          | Yes  | Yes  | 2+                   | Clin,ACTH,Scort, UFC,LDST, HDST           | No    | N/A |            |
| Val-97     | none          | F   | 43         | 21.3 | wg,mf                         | HTN                   | 0.5       | No             | 111.4                               | 24.20                           | 660.00                          | Yes  | Yes  | 3+                   | Clin,ACTH,Scort, UFC,LDST,HDST,MRI, BIPSS | Yes   | N/A |            |
| Val-98     | none          | F   | 54         | 25.4 | f,ed                          | DM,HTN                | 1.6       | No             | 60.2                                | 35.96                           | 1395.68                         | Yes  | Yes  | 2+                   | Clin,ACTH,Scort, UFC,LDST, HDST,MRI       | Yes   | Yes | 48         |
| Val-99     | none          | F   | 19         | 18.7 | wg,acne,amen, mf              |                       | N/A       | No             | 20.4                                | 8.47                            | 438.84                          | Yes  | Yes  | 3+                   | Clin,ACTH,Scort, UFC,LDST, HDST           | Yes   | No  |            |
| Val-100    | none          | F   | 39         | 19.7 | mf                            | DM                    | N/A       | N/A            | 171.0                               | 37.68                           | 1434.45                         | N/A  | Yes  | 3+                   | Clin,ACTH,Scort, UFC,HDST                 | Yes   | No  |            |
| Val-101    | none          | F   | 43         | 28.2 | wg,amen                       |                       | 0.8       | Yes            | N/A                                 | 29.00                           | N/A                             | N/A  | N/A  | +                    | Clin,Scort,MRI                            | No    | N/A |            |
| Val-102    | none          | M   | 31         | 27.4 | wg,acne                       | OSTEO,HTN             | 0.9       | No             | 99.1                                | 11.08                           | 412.00                          | Yes  | Yes  | 3+                   | Clin,ACTH,Scort, UFC,LDST, HDST,MRI       | Yes   | No  |            |
| Val-103    | none          | F   | 29         | 26.3 | wg,skin,bh,acne               | HTN                   | 1.5       | Yes            | 80.7                                | N/A                             | 447.00                          | N/A  | N/A  | 3+                   | Clin,ACTH,UFC, MRI                        | Yes   | No  |            |
| Val-104    | none          | F   | 43         | 27.5 | wg,amen,mf                    |                       | N/A       | N/A            | 119.0                               | N/A                             | N/A                             | N/A  | N/A  | 3+                   | Clin,ACTH                                 | Yes   | No  |            |
| Val-105    | none          | F   | 34         | 21.2 | acne                          | HTN                   | N/A       | No             | 68.1                                | 35.49                           | 570.65                          | Yes  | Yes  | 3+                   | Clin,ACTH,Scort, UFC,LDST, HDST           | Yes   | Yes | 48         |
| Val-106    | none          | M   | 40         | 25.9 | wg,mf,bh,ed,str               | HTN                   | 4.5       | Yes            | 163.0                               | 17.07                           | 994.29                          | Yes  | Yes  | +                    | Clin,ACTH,Scort, UFC,LDST, HDST,MRI       | No    | N/A |            |
| Val-107    | none          | F   | 58         | 32.5 | wg,mf,bh                      | HYKM,HTN              | N/A       | N/A            | 91.8                                | N/A                             | N/A                             | N/A  | N/A  | 3+                   | Clin,ACTH                                 | Yes   | No  |            |
| Val-108    | none          | M   | 41         | 29.1 | wg,mf,bh                      |                       | N/A       | N/A            | 476.0                               | N/A                             | N/A                             | N/A  | N/A  | 3+                   | Clin,ACTH                                 | No    | N/A |            |

\* The diagnosis of PAs in all cases was histologically confirmed by two senior pathologists after surgical resection. Each sample displayed positive immunostaining for ACTH and negative for other hormones, such as growth hormone (GH), prolactin (PRL), thyroid stimulating hormone (TSH), etc.

**WES** : whole exome sequencing cohort. **Val** : validation cohort, Val1-Val67 denote patients with mutation, Val68-V108 denote patients with no mutation. **BMI**: body mass index. **Size**: denote maximal adenoma diameter. **LDST**: denotes nonsuppressible serum cortisol levels following administration of 1 mg of dexamethasone. **HDST**: denotes suppressible 24-hr UFC following administration of 8mg of dexamethasone. **IPOBR**: immediate postoperative biochemical remission, which was defined on the basis of the biochemical evidence of adrenal cortical insufficiency as witnessed by the drop in the immediate postoperative serum cortisol (range, < 3µg/dL). **POR**: postoperative recurrence, which was defined when a patient with initial biochemical and clinical evidence for remission after operation developed symptomatic recurrence of Cushing disease with biochemical reconfirmation of pituitary-dependent endogenous hypercortisolism. **RP**: recurrence period.

**N/A** denotes not available: some clinical records were incomplete mainly owing to evaluation having been performed at outside hospitals, with detailed records missing from our hospital medical record. For these patients, the pathological and/or imageological evidence was especially crucial for the diagnosis.

**Associated signs and symptoms**: wg, recent weight gain; mf, moon facies, facial plethora; bh, buffalo hump; str, striae; ed, peripheral edema; amen, amenorrhea or menstrual abnormalities; hair, thinning of hair or alopecia; acne, increased acne; f, fatigue or weakness; ina, inappetence; emot, emotional lability or depression; ecch, Ecchymosis or easy bruisability; skin, thin skin; infx, recurrent or difficult-to-treat infections; pigm, pigmentation.

**Accompanying diseases**: DM, diabetes mellitus; HTN, hypertension; OSTEO, osteoporosis or osteopenia; HYKM, hypokalemia

**Diagnostic criteria**: Clin, documented clinical symptoms suggestive of Cushing syndrome; UFC, denotes elevated urinary free cortisol; ACTH, denotes elevated morning plasma ACTH; Scort, denotes elevated midnight serum cortisol; MRI, denotes visualized adenomas by MRI; BIPSS, denotes inferred microadenomas(<6mm) by bilateral inferior petrosal sinus sampling

**Immunostain for ACTH** : Two expert pathologists provided a semi-quantitative estimate of the ACTH immunopositive staining at high magnification (×400). Ten optimal fields with highest tumoral ACTH staining and minimal background reactivity were used to estimate the percentage of stained cells. Average percentage positivity was scored according as mean observed in ten fields and was categorized as: -(no reactivity), + (<30% of the neoplastic cells positive), 2+ (31%-60% positive), and 3+ (>60% positive).
