# Supplementary material for: Recurrent gain-of-function USP8 mutations in Cushing's disease
Source: PubMed Central journal article supplement — Cell Res. 2015 Feb 13;25(3):306–17. doi: 10.1038/cr.2015.20 (PMC4349249; doi:10.1038/cr.2015.20), 2015-02-13
Supplement: cr201520x4.pdf [file cr201520x4.pdf]

## Supplementary information, Table S4

**Table S4 Sequence of primers or shRNA against human USP8**

Primers used for site-directed mutagenesis

|                                    |                                                                                                |
|------------------------------------|------------------------------------------------------------------------------------------------|
| P720R-forward<br>P720R-reverse     | 5-tgaagcgctcctactcctccgagatataaccaggctattc-3<br>5-gaatagcctgggttatatctcgggaggagtaggagcgcttca-3 |
| S718del-forward<br>S718del-reverse | 5-tccaaactgaagcgctcctactcccagatataaccaggc-3<br>5-gcctgggttatatctggggagtaggagcgcttcagttgga-3    |
| S718P-forward<br>S718P-reverse     | 5-ccaaactgaagcgctcctaccctcccagatataaccag-3<br>5-ctgggttatatctggggagggtaggagcgcttcagttgg-3      |

Primers used for RT-QPCR

|                              |                                                            |
|------------------------------|------------------------------------------------------------|
| EGFR-forward<br>EGFR-reverse | 5-catttaggggtgactcctcac -3<br>5-gaatcagcaaaaaccctgtgat -3  |
| USP8-forward<br>USP8-reverse | 5-aaaggacaaccagaaagtggaa -3<br>5-gctctgtcaaaggttctcgtt -3  |
| POMC-forward<br>POMC-reverse | 5-accacggaaagcaacctg-3<br>5-gtggcccatgacgtactc-3           |
| HPRT-forward<br>HPRT-reverse | 5-accagtcaacaggggacataaa -3<br>5-ctgaccaaggaaagcaaagtct -3 |

Sequence of shUSP8

|          |                                                                 |
|----------|-----------------------------------------------------------------|
| shUSP8-1 | 5- ccggtcaagcaacagcaggattattctcgagaataatcctgctggttgctgattttg -3 |
| shUSP8-2 | 5- ccggtcaagcaacagcaggattattctcgagaataatcctgctggttgctgattttg -3 |
