# Supplementary material for: Recurrent gain-of-function USP8 mutations in Cushing's disease
Source: PubMed Central journal article supplement — Cell Res. 2015 Feb 13;25(3):306–17. doi: 10.1038/cr.2015.20 (PMC4349249; doi:10.1038/cr.2015.20), 2015-02-13

## Supplementary information, Figure S2

**Figure S2 Validation of three *USP8* mutations detected by whole-exome sequencing.** T, DNA from tumor; N, DNA from paired blood. Arrows indicate mutated bases.

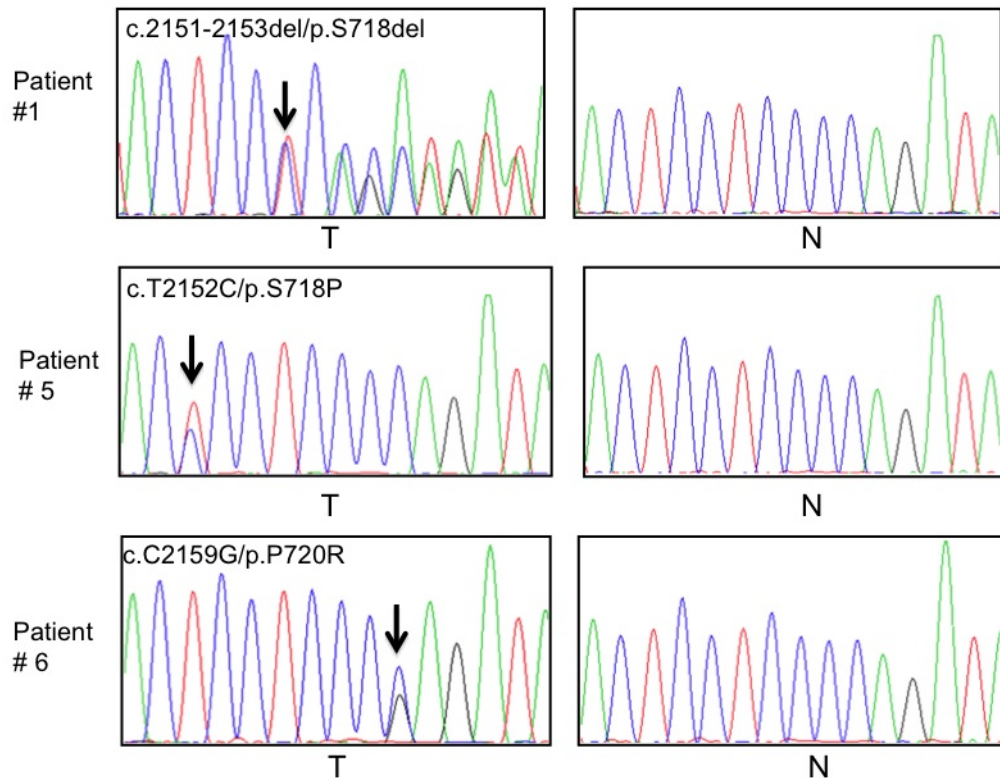

Supplement: cr201520x6.pdf [file cr201520x6.pdf]
