# Supplementary material for: Recurrent gain-of-function USP8 mutations in Cushing's disease
Source: PubMed Central journal article supplement — Cell Res. 2015 Feb 13;25(3):306–17. doi: 10.1038/cr.2015.20 (PMC4349249; doi:10.1038/cr.2015.20), 2015-02-13

## Supplementary information, Figure S3

**Figure S3** The allele frequencies of somatic mutations identified by **whole-exome sequencing**. Variant allele frequencies of USP8 mutation are highlighted in red.

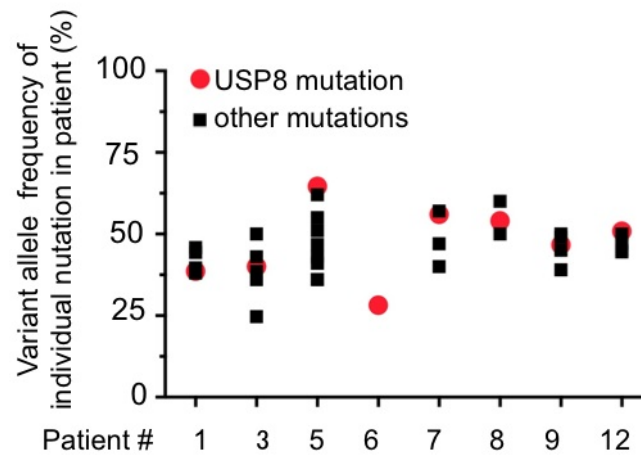

Supplement: cr201520x7.pdf [file cr201520x7.pdf]
