# Supplementary material for: Recurrent gain-of-function USP8 mutations in Cushing's disease
Source: PubMed Central journal article supplement — Cell Res. 2015 Feb 13;25(3):306–17. doi: 10.1038/cr.2015.20 (PMC4349249; doi:10.1038/cr.2015.20), 2015-02-13

## Supplementary information, Figure S4

Figure S4 Validation of other 14 types of *USP8* mutations in 108 ACTH-secreting

PAs by PCR and Sanger sequencing. Arrows indicate mutated bases.

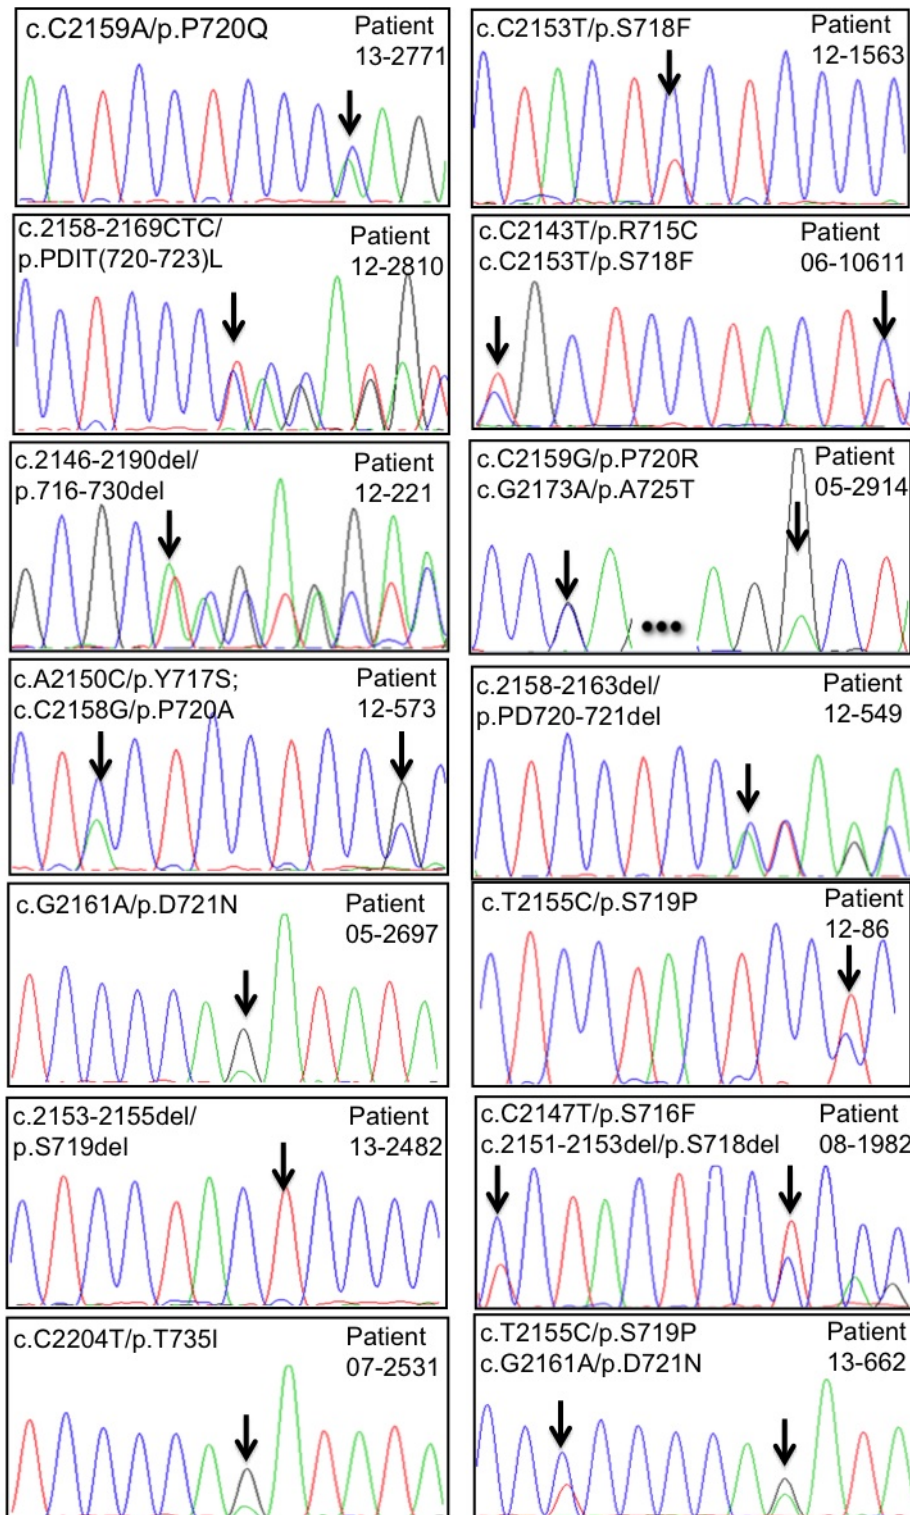

Supplement: cr201520x8.pdf [file cr201520x8.pdf]
