# Supplementary material for: Recurrent gain-of-function USP8 mutations in Cushing's disease
Source: PubMed Central journal article supplement — Cell Res. 2015 Feb 13;25(3):306–17. doi: 10.1038/cr.2015.20 (PMC4349249; doi:10.1038/cr.2015.20), 2015-02-13
Supplement: cr201520x9.pdf [file cr201520x9.pdf]

## Supplementary information, Figure S5

**Figure S5 Multi-alignment of partial amino acid sequence of USP8 in variety of species.** The putative 14-3-3 protein binding motif is highlighted by red. Serine at the fourth position in this motif is phosphorylated for the binding of USP8 to 14-3-3 protein and indicated by arrow.

|           |     | 14-3-3 binding motif                         |     |
|-----------|-----|----------------------------------------------|-----|
| Human     | 705 | ERDREPSKLKRSYSSPDITQAIQEEEEKRKPTVTPTVNRENKP  | 746 |
| Mouse     | 678 | ERDREPSKLKRSYSSPDITQALQEEEEKRRPAVTPMVNRENKP  | 719 |
| Rat       | 668 | ERDREPSKLKRSYSSPDITQALQEEEEKRRPAVTPPTVNRENKP | 709 |
| Bovine    | 672 | ERDREPSKLKRSYSSPDITQAIQEEEEKRRPTVTPAVNRENKP  | 713 |
| Zebrafish | 705 | ERDREPSKLKRSYSSPDITQAIQEEEEKRKPTVTPTVNRENKP  | 746 |

↑  
phosphorylation
