# Supplementary material for: Recurrent gain-of-function USP8 mutations in Cushing's disease
Source: PubMed Central journal article supplement — Cell Res. 2015 Feb 13;25(3):306–17. doi: 10.1038/cr.2015.20 (PMC4349249; doi:10.1038/cr.2015.20), 2015-02-13

## Supplementary information, Figure S6

**Figure S6 Increased Erk1/2 phosphorylation in *USP8*-mutated PAs.** Cell lysates from *USP8*-WT or mutated PAs were subjected for immunoblot analysis for phospho-Erk1/2 (p-Erk1/2) and total Erk1/2 (left) expression. The densitometric ratio of p-Erk1/2 to total-Erk1/2 was calculated (right). Each symbol represents individual case. Lines indicate the median with interquartile range (25% and 75%). P values were calculated by Mann-Whitney *U* test.

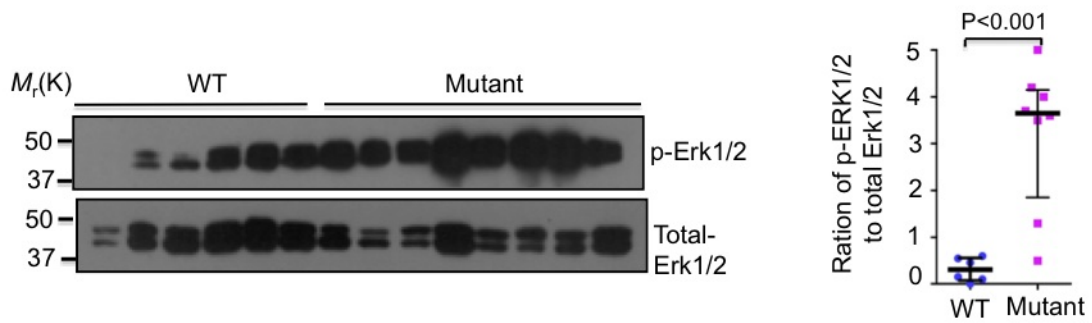

Supplement: cr201520x10.pdf [file cr201520x10.pdf]
