# Supplementary material for: Recurrent gain-of-function USP8 mutations in Cushing's disease
Source: PubMed Central journal article supplement — Cell Res. 2015 Feb 13;25(3):306–17. doi: 10.1038/cr.2015.20 (PMC4349249; doi:10.1038/cr.2015.20), 2015-02-13

## Supplementary information, Figure S8

Figure S8 Representative immunohistochemical staining of ErbB3 and C-Met in

*USP8*-mutated ACTH-secreting PAs. Scale bar, 50  $\mu$ m.

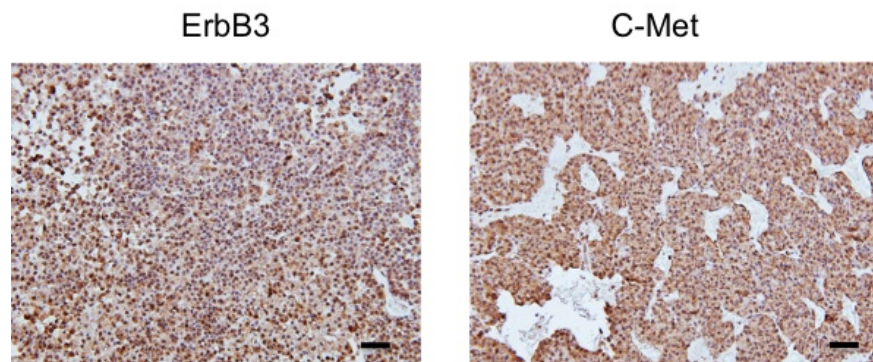

Supplement: cr201520x12.pdf [file cr201520x12.pdf]
