# Supplementary material for: Recurrent gain-of-function USP8 mutations in Cushing's disease
Source: PubMed Central journal article supplement — Cell Res. 2015 Feb 13;25(3):306–17. doi: 10.1038/cr.2015.20 (PMC4349249; doi:10.1038/cr.2015.20), 2015-02-13

## Supplementary information, Figure S9

**Figure S9** Contrast-enhanced T1 weighted MRI and immunohistochemical staining of ACTH in 12 PAs used for whole-exome sequencing (WES). PA's ID is shown on the top left.

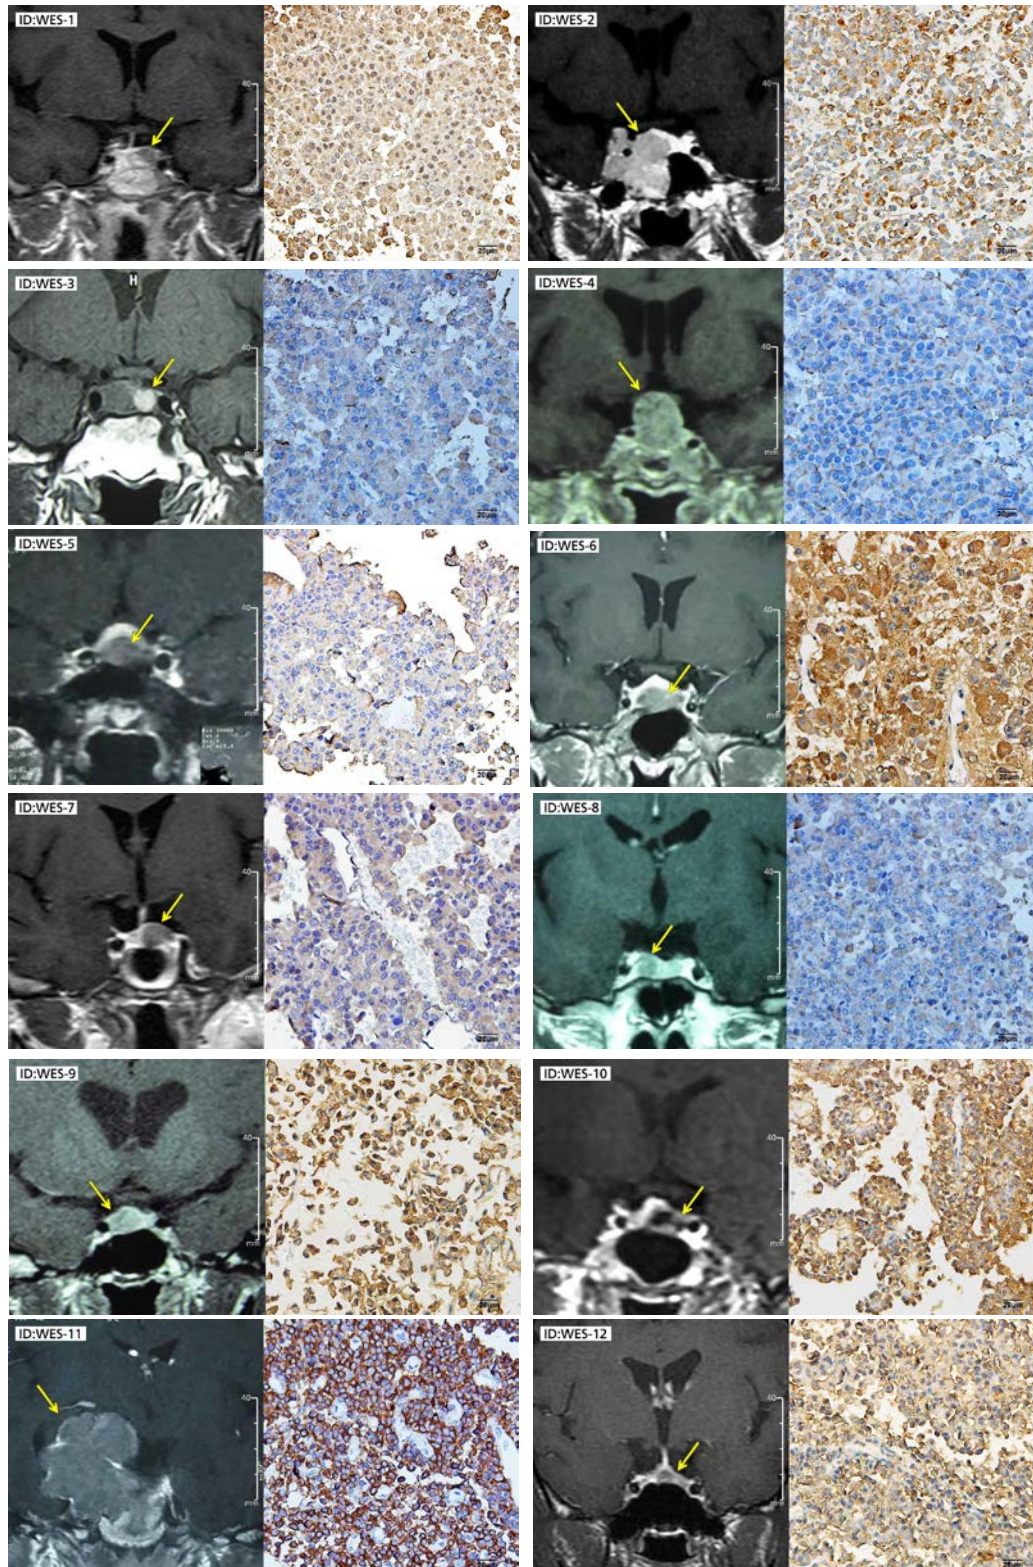

Supplement: cr201520x13.pdf [file cr201520x13.pdf]
